# Supplementary material for: Type 1 Diabetic Akita Mouse Hearts Are Insulin Sensitive but Manifest Structurally Abnormal Mitochondria That Remain Coupled Despite Increased Uncoupling Protein 3
Source: Oxford University Press journal article supplement (doi:10.2337/db08-0079), 2008-08-05
Supplement: db08-00791_suppl.doc [file db08-00791_suppl.doc]

**Supplementary Materials for**

**Type 1 Diabetic Akita Mouse Hearts are Insulin Sensitive but Manifest Structurally Abnormal Mitochondria that Remain Coupled Despite Increased Uncoupling Protein 3**

Heiko Bugger1, Sihem Boudina1, Xiao Xuan Hu1, Joseph Tuinei1, Vlad G Zaha1, Heather Theobald1, Ui Jeong Yun1, Alfred McQueen2, Benjamin Wayment2, Sheldon E Litwin2, and E. Dale Abel1

**SUPPLEMENTARY METHODS**

***Oxidative stress:*** Tissue ROS levels were measured by the conversion of non-fluorescent 2’, 7’-dichlorofluorescein-diacetate (DCFDA) to the highly fluorescent 2’, 7’-dichlorofluorescein (DCF) in the presence of esterases and ROS (1). Hearts were homogenized in homogenization buffer (50mM phosphate buffer, 1mM EDTA, 1 tablet Complete Mini Protease Inhibitor Cocktail (Roche, Nutley, NJ), 1 tablet Phosphatase Inhibitor Cocktail 1 and 2 (Sigma-Aldrich, St. Louis, MO), pH 7.4) and centrifuged at 900g for 15min. The supernatant was centrifuged at 12,000g for 15min, and 100μg of supernatant protein were incubated with 25μM final concentration of oxidation-sensitive carboxy-H2DCFDA (C400, Molecular Probes, Carlsbad, CA) or oxidation-insensitive carboxy-DCFDA (C369, Molecular Probes, Carlsbad, CA) at 37°C. Measurements were taken at 0 and 30min using a microplate fluorescence reader (485nm excitation/530nm emission). Data are expressed as fold change of the ratios of C400/C369.

***Western-blot analysis:*** Isolated mitochondria or whole cell extracts were prepared as described before (2; 3). Proteins were resolved by SDS-PAGE and incubated with the following primary/secondary antibodies: MnSOD (1:2000/1:5000, BD Biosciences, San Jose, CA), Peroxiredoxin (1:1000/1:5000, Upstate Biotechnology, Lake Placid, NY), UCP3 (1:1000/1:5000, Abcam, Cambridge, MA), total Akt (1:2000/1:2000, Santa Cruz Biotechnology, Santa Cruz, CA), phospho-Akt (Ser473) (1:1000/1:1000, Cell Signaling, Danvers, MA). Blots were developed using ECL detection reagent (GE Healthcare, Piscataway, NJ). Protein concentrations were determined using the Micro BCA Protein Assay Kit (Pierce, Rockford, IL), and equal protein loading was verified by Coomassie staining.

**SUPPLEMENTARY RESULTS**

In 10 week-old WT mice, exposure to isoproterenol for 5-days, resulted in a significant increase in heart rate and cardiac output, as well as posterior wall thickness and interventricular septum diameter. In contrast, cardiac output did not change in Akita following treatment, accompanied by a significant but blunted increase in heart rate and a reduction in stroke volume compared to isoproterenol-treated WT. Similarly, posterior wall thickness and interventricular septum diameter were not increased in Akita after treatment (Supplementary table 5). Thus Akita hearts exhibited impaired adaptation to chronic beta-adrenergic stimulation. The molecular mechanisms for this remain to be elucidated, but could represent a manifestation of mitochondrial dysfunction, similar to the reduced adrenergic heart rate responsiveness of mice that lack PGC-1 or PGC-1 respectively (4; 5). In addition, -adrenergic receptor (-AR) desensitization could occur more rapidly in Akita mouse hearts in line with earlier reports suggesting that -AR desensitization is increased in the hearts of insulin deficient diabetic models (6).

**SUPPLEMENTARY TABLES**

**Supplementary Table 1**: Primer sequences and accession numbers of genes used for

quantification of mRNA levels by real-time RT-PCR.

| **Gene** | **Forward/Reverse**  **primer sequences** | **Accession**  **number** |
| --- | --- | --- |
| Peroxisome proliferator activated receptor α (PPARα) | GAGAATCCACGAAGCCTACC  AATCGGACCTCTGCCTCTTT | NM_011144 |
| CD36 antigen (CD36)/ fatty acid translocase (FAT) | CCATTGGTGATGAAAAAGCA  GATCGGCTTTACCAAAGATGTAG | NM_007643 |
| Solute carrier family 27 (fatty acid transporter), member 1 (FATP) | CCATCTTCCTGCGTCTTCTG  GTGTCAGGCTCCCAGGTCTC | NM_011977 |
| Carnitine palmitoyltransferase 1b, muscle (CPT1b) | TGCCTTTACATCGTCTCCAA  AGACCCCGTAGCCATCATC | NM_009948 |
| Carnitine palmitoyltransferase 2 (CPT2) | CCAGCTGACCAAAGAAGCA  GCAGCCTATCCAGTCATCGT | NM_009949 |
| Acyl-Coenzyme A dehydrogenase, medium chain (MCAD) | ACTGACGCCGTTCAGATTTT  GCTTAGTTACACGAGGGTGATG | NM_007382 |
| Acyl-Coenzyme A dehydrogenase,  long chain (LCAD) | ATGGCAAAATACTGGGCATC  TCTTGCGATCAGCTCTTTCA | NM_007381 |
| Hydroxyacyl-Coenzyme A dehydrogenase/3-ketoacyl-Coenzyme A thiolase/enoyl Coenzyme A hydratase (trifunctional protein), subunit b (Hadhb) | GCCAACAGACTGAGGAAGGA  ACACTGGCAAGGCTGGATT | NM_145558 |
| Malonyl-Coenzyme A decarboxylase (MCD) | GCTCTACAGATGCCACCACA  GCACGGCACAAACTCTCTCT | NM_019966 |
| Mitochondrial acyl-Coenzyme A thioesterase 1 (MTE1) | GACCTCCCCAAGAGCATAGA  TCCTTGTAGGAGATGGTGTTCC | NM_134188 |
| Solute carrier family 2 (facilitated glucose transporter), member 4 (GLUT4) | GGCATGGGTTTCCAGTATGT  GAGGAAAGGAGGGAGTCTGG | NM_009204 |
| Solute carrier family 2 (facilitated glucose transporter), member 1 (GLUT1) | GTCCTGCTCGTATTGCTGTG  GCCTTTGGTCTCAGGGACTT | NM_011400 |
| Pyruvate dehydrogenase kinase, isoenzyme 4 (PDK4) | GCTTGCCAATTTCTCGTCTC  CTTCTCCTTCGCCAGGTTCT | NM_013743 |
| NADH dehydrogenase (ubiquinone) flavoprotein 1 (Ndufv1) | TGTGAGACCGTGCTAATGGA  CATCTCCCTTCACAAATCGG | NM_133666 |
| NADH dehydrogenase (ubiquinone) 1 alpha subcomplex 9 (Ndufa9) | ATCCCTTACCCTTTGCCACT  CCGTAGCACCTCAATGGACT | NM_025358 |
| Ubiquinol-cytochrome c reductase core protein 1 (Uqcrc1) | TGCCAGAGTTTCCAGACCTT  CCAAATGAGACACCAAAGCA | NM_025407 |
| Cytochrome c oxidase subunit IV isoform 1 (COX4) | CGCTGAAGGAGAAGGAGAAG  GCAGTGAAGCCAATGAAGAA | NM_009941 |
| ATPase 6, mitochondrial (ATPase6) | CAAACAAATAATGCTAATCCACACACC  GCTGTAAGCCGGACTGCTAATG | NC_005089.1 |
| Uncoupling protein 2 (UCP2) | TCTCCTGAAAGCCAACCTCA  CTACGTTCCAGGATCCCAAG | NM_011671 |
| Uncoupling protein 3 (UCP3) | TTTGGAGCTGGCTTCTGTG  AAGGCCCTCTTCAGTTGCTC | NM_009464 |
| Peroxisome proliferator activated receptor γ co-activator 1α (PGC-1α) | GTAAATCTGCGGGATGATGG  AGCAGGGTCAAAATCGTCTG | NM_008904 |
| Peroxisome proliferator activated receptor γ co-activator 1β (PGC-1β) | TGAGGTGTTCGGTGAGATTG  CCATAGCTCAGGTGGAAGGA | NN_133249 |
| Nuclear respiratory factor 1 (NRF1) | CTTCAGAACTGCCAACCACA  GCTTCTGCCAGTGATGCTAC | NM_010938 |
| Estrogen related receptor α (ERRα) | GGAGGACGGCAGAAGTACAA  CAGGTTCAACAACCAGCAGA | NM_007953 |
| Transcription factor A, mitochondrial (TFAm) | CAAAAAGACCTCGTTCAGCA  CTTCAGCCATCTGCTCTTCC | NM_009360 |
| Superoxide dismutase 2, mitochondrial (SOD2) | ACAACTCAGGTCGCTCTTCA  GAACCTTGGACTCCCACAGA | NM_013671 |
| Glutathione peroxidase 1 (GPX1) | GTCCACCGTGTATGCCTTCT  TCACCATTCACTTCGCACTT | NM_008160 |
| Peroxiredoxin 3 (PRDX3) | ACGGAGTGCTGTTGGAAAGT  TTGATCGTAGGGGACTCTGG | NM_007452.2 |

**Supplementary Table 2**: Heart weight (HW), body weight (BW), tibia length (TL), HW-BW-ratio, and HW-TL-ratio of 10, 24, and

54 week-old WT and Akita mice.

|  | Body weight  [g] | Heart weight  [mg] | Tibia length  [mm] | HW-BW-ratio  [mg/g] | HW-TL-ratio  [mg/mm] |
| --- | --- | --- | --- | --- | --- |
| WT 10wk (6) | 24.0 ± 0.8 | 111.3 ± 4.8 | 16.8 ± 0.2 | 4.6 ± 0.1 | 6.6 ± 0.3 |
| Akita 10wk (8) | 22.4 ± 0.5 | 105.1 ± 2.2 | 16.5 ± 0.1 | 4.7 ± 0.1 | 6.4 ± 0.1 |
| WT 24wk (8) | 27.9 ± 0.9 | 112.1 ± 2.3 | 17.4 ± 0.1 | 4.0 ± 0.1 | 6.4 ± 0.1 |
| Akita 24wk (6) | 24.4 ± 0.4 Ψ | 102.5 ± 2.2 * | 17.1 ± 0.2 | 4.2 ± 0.1 | 6.0 ± 0.1 * |
| WT 54wk (6) | 31.5 ± 0.8 | 141.8 ± 4.2 | 17.7 ± 0.1 | 4.5 ± 0.1 | 8.0 ± 0.2 |
| Akita 54wk (3) | 24.9 ± 0.4 Ψ | 114.8 ± 1.0 Ψ | 17.7 ± 0.2 | 4.6 ± 0.1 | 6.5 ± 0.1 Ψ |

* p<0.05, Ψ p<0.01 vs. WT

**Supplementary Table 3**: Evaluation of cardiac chamber dimensions of WT and Akita mice at 20, 36 and 54 weeks of age by echocardiography.

|  | LVDd [cm] | LVDs [cm] | LVPWd [cm] | IVSd [cm] |
| --- | --- | --- | --- | --- |
| WT 20wk (9) | 0.38 ± 0.01 | 0.24 ± 0.01 | 0.08 ± 0.01 | 0.08 ± 0.01 |
| Akita 20wk (7) | 0.38 ± 0.01 | 0.23 ± 0.01 | 0.08 ± 0.01 | 0.08 ± 0.01 |
| WT 36wk (6) | 0.36 ± 0.02 | 0.22 ± 0.01 | 0.10 ± 0.01 | 0.11 ± 0.01 |
| Akita 36wk (5) | 0.36 ± 0.01 | 0.22 ± 0.02 | 0.11 ± 0.01 | 0.11 ± 0.01 |
| WT 54wk (6) | 0.43 ± 0.01 | 0.33 ± 0.02 | 0.06 ± 0.01 | 0.07 ± 0.01 |
| Akita 54wk (6) | 0.39 ± 0.01 Ψ | 0.28 ± 0.01 | 0.07 ± 0.01 | 0.06 ± 0.01 |

LVDd, Left ventricular cavity diameter at diastole; LVDs, Left ventricular cavity diameter at systole; LVPWd, Left ventricular posterior wall thickness at diastole; IVSd, Interventricular septum diameter at diastole. Ψ p<0.05 vs. WT

**Supplementary Table 4**: Effect of calcium-induced increase in workload on contractility of 15 week-old WT and Akita mouse hearts

perfused in the Langendorff mode (n=4).

|  | WT | | Akita | |
| --- | --- | --- | --- | --- |
|  | 2mM Ca2+ | 4mM Ca2+ | 2mM Ca2+ | 4mM Ca2+ |
| HR [bpm] | 280 ± 38 | 263 ± 15 | 195 ± 24 | 202 ± 32 |
| DP [mmHg] | 18.9 ± 3.5 | 21.8 ± 3.8 | 16.4 ± 2.6 | 16.8 ± 2.0 |
| SP [mmHg] | 55.8 ± 1.5 | 92.3 ± 10.9 * | 62.8 ± 4.7 | 105 ± 11.7 * |
| DevP [mmHg] | 37.0 ± 4.7 | 70.5 ± 11.8 * | 46.4 ± 3.9 | 88.2 ± 13.6 * |
| RPP [mmHg x bpm] | 10,194 ± 1467 | 18,159 ± 2487 * | 9,194 ± 1648 | 16,921 ± 2164a |
| dP/dt min [mmHg/s] | -1,710 ± 105 | -1,791 ± 115 | -1,628 ± 66 | -1,873 ± 105 |
| dP/dt max [mmHg/s] | 1,710 ± 105 | 2,158 ± 181 | 1,791 ± 94 | 2,321 ± 139 * |

HR, Heart rate; DP, Diastolic pressure; SP, Systolic pressure; DevP, Developed pressure; RPP, Rate pressure product; * p<0.05 vs. 2mM Ca2+, a p=0.06 vs. 2mM Ca2+

**Supplementary Table 5**: Echocardiography of 10 week-old WT and Akita mice following treatment with 17mg/kg/d Isoproterenol for 5

days (n=3).

|  | WT | WT + Isoproterenol | Akita | Akita + Isoproterenol |
| --- | --- | --- | --- | --- |
| CO [μl/min/gBW] | 403 ± 22 | 667 ± 60 Ψ | 350 ± 15 | 363 ± 92 θ |
| SV [µl/gBW] | 1.07 ± 0.06 | 1.11 ± 0.05 | 0.97 ± 0.06 | 0.70 ± 0.16 θ |
| HR [bpm] | 378 ± 17 | 599 ± 35 Ψ | 360 ± 16 | 509 ± 27 Ψ θ |
| EF [%] | 67 ± 3 | 81 ± 6 | 67 ± 2 | 72 ± 7 |
| FS [%] | 31.3 ± 1.9 | 39.3 ± 3.8 | 29.0 ± 1.5 | 35.7 ± 5.5 |
| IVSd [cm] | 0.087 ± 0.003 | 0.130 ± 0.012 Ψ | 0.097 ± 0.012 | 0.107 ± 0.009 |
| LVDd [cm] | 0.377 ± 0.007 | 0.310 ± 0.015 Ψ | 0.370 ± 0.012 | 0.327 ± 0.015 Ψ |
| LVDs [cm] | 0.260 ± 0.006 | 0.187 ± 0.029 Ψ | 0.260 ± 0.010 | 0.210 ± 0.015 Ψ |
| LVPWd [cm] | 0.083 ± 0.003 | 0.123 ± 0.020 Ψ | 0.087 ± 0.007 | 0.107 ± 0.007 |

CO, Cardiac output; SV, Stroke volume; HR, Heart rate; EF, Ejection fraction; FS, Fractional shortening; IVSd, Interventricular septum diameter at diastole; LVDd, Left ventricular cavity diameter at diastole; LVDs, Left ventricular cavity diameter at systole; LVPWd, Left ventricular posterior wall thickness at diastole; gBW, body weight in grams. Ψ p<0.05 vs. without Isoproterenol, θ p<0.05 vs. WT + Isoproterenol

**REFERENCES**

1. Kim HJ, Kim KW, Yu BP, Chung HY: The effect of age on cyclooxygenase-2 gene expression: NF-kappaB activation and IkappaBalpha degradation. *Free Radic Biol Med* 28:683-692, 2000

2. Boudina S, Sena S, O'Neill BT, Tathireddy P, Young ME, Abel ED: Reduced mitochondrial oxidative capacity and increased mitochondrial uncoupling impair myocardial energetics in obesity. *Circulation* 112:2686-2695, 2005

3. Boudina S, Sena S, Theobald H, Sheng X, Wright JJ, Hu XX, Aziz S, Johnson JI, Bugger H, Zaha VG, Abel ED: Mitochondrial energetics in the heart in obesity-related diabetes: direct evidence for increased uncoupled respiration and activation of uncoupling proteins. *Diabetes* 56:2457-2466, 2007

4. Lelliott CJ, Medina-Gomez G, Petrovic N, Kis A, Feldmann HM, Bjursell M, Parker N, Curtis K, Campbell M, Hu P, Zhang D, Litwin SE, Zaha VG, Fountain KT, Boudina S, Jimenez-Linan M, Blount M, Lopez M, Meirhaeghe A, Bohlooly YM, Storlien L, Stromstedt M, Snaith M, Oresic M, Abel ED, Cannon B, Vidal-Puig A: Ablation of PGC-1beta results in defective mitochondrial activity, thermogenesis, hepatic function, and cardiac performance. *PLoS Biol* 4:e369, 2006

5. Leone TC, Lehman JJ, Finck BN, Schaeffer PJ, Wende AR, Boudina S, Courtois M, Wozniak DF, Sambandam N, Bernal-Mizrachi C, Chen Z, Holloszy JO, Medeiros DM, Schmidt RE, Saffitz JE, Abel ED, Semenkovich CF, Kelly DP: PGC-1alpha deficiency causes multi-system energy metabolic derangements: muscle dysfunction, abnormal weight control and hepatic steatosis. *PLoS Biol* 3:e101, 2005

6. Roth DA, White CD, Hamilton CD, Hall JL, Stanley WC: Adrenergic desensitization in left ventricle from streptozotocin diabetic swine. *J Mol Cell Cardiol* 27:2315-2325, 1995
